# Supplementary material for: Rfa2 is specifically dephosphorylated by Pph3 in Candida albicans
Source: PubMed Central journal article supplement — Biochem J. 2013 Jan 9;449(Pt 3):673–81. doi: 10.1042/BJ20120952 (PMC3542820; doi:10.1042/bj20120952), 2013-01-09
Supplement: bj4490673add.pdf [file bj4490673add.pdf]

## SUPPLEMENTARY ONLINE DATA

Rfa2 is specifically dephosphorylated by Pph3 in *Candida albicans*Haitao WANG\*<sup>†1</sup>, Jiaxin GAO\*<sup>1</sup>, Ada Hang-Heng WONG<sup>‡</sup>, Kangdi HU\*, Wanjie LI\*, Yue WANG<sup>†2</sup> and Jianli SANG\*<sup>2</sup>

\*Key Laboratory of Cell Proliferation and Regulation Biology, Ministry of Education, College of Life Sciences, Beijing Normal University, Beijing 100875, People's Republic of China,

<sup>†</sup>Institute of Molecular and Cell Biology, Agency for Science, Technology and Research (A\*STAR), Singapore 138673, and <sup>‡</sup>Protein Science Laboratory, School of Life Sciences, Tsinghua University, Beijing 100084, People's Republic of China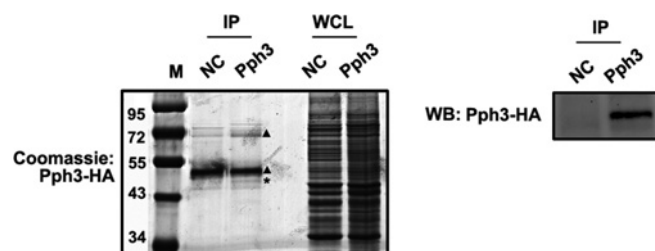Figure S1 SDS/PAGE of immunopurified Pph3 from WT *C. albicans* cells

Left-hand side: C-terminally HA (haemagglutinin)-tagged Pph3 was immunopurified by an anti-HA antibody from *C. albicans* cells (HT28 and HT29) and resolved by SDS/PAGE (10% gel). The asterisk denotes Pph3 and triangles denote the antibody fragments. Right-hand side: Western blotting of the immunopurified Pph3 using an anti-HA antibody.

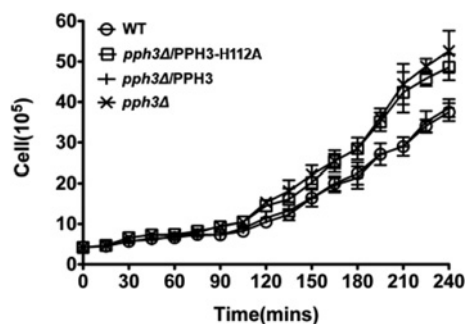Figure S2 Cell growth in wild-type, *pph3Δ/PPH3-H112A*, *pph3Δ/PPH3* and *pph3Δ* mutant cells

WT (SC5314 or BWP17), *pph3Δ/PPH3-H112A* (HT29), *pph3Δ/PPH3* (HT28) and *pph3Δ* (S.JL3) mutant cells were grown in liquid YPD medium at 30°C for 4 h. Cells were counted in triplicate parallel experiments at the times indicated.

<sup>1</sup> These authors contributed equally to this work.<sup>2</sup> Correspondence may be addressed to either of these authors (email jlsang@bnu.edu.cn or mcbwangy@imcb.a-star.edu.sg).

**Table S1** *C. albicans* strains used in the present study

| Strains | Relevant genotype                                                                                       | Source            |
|---------|---------------------------------------------------------------------------------------------------------|-------------------|
| SC5314  | WT, clinical isolate                                                                                    |                   |
| BWP17   | ura3/ura3 his1::hisG/his1::hisG arg4::hisG/arg4::hisG                                                   | [1]               |
| SJL2    | BWP17 pph3Δ::ARG4/ pph3Δ::HIS1                                                                          | [2]               |
| SJL2.1  | BWP17 pph3Δ::ARG4/ pph3Δ::HIS1 PPH3:URA3                                                                | [2]               |
| SJL3    | BWP17 pph3Δ::ARG4/ pph3Δ::HIS1 URA3                                                                     | [2]               |
| SJL5    | BWP17 psy2Δ::ARG4/ psy2Δ::HIS1                                                                          | [2]               |
| SJL5.1  | BWP17 psy2Δ::ARG4/ psy2Δ::HIS1 PSY2:URA3                                                                | [2]               |
| SJL6    | BWP17 psy2Δ::ARG4/ psy2Δ::HIS1 URA3                                                                     | [2]               |
| HKD1.1  | BWP17 ptc2Δ::ARG4/ ptc2Δ::HIS1 URA3                                                                     | The present study |
| HKD2    | BWP17 pph3Δ::ARG4/ pph3Δ::HIS1 ptc2Δ::FRT/ ptc2Δ::FRT URA3                                              | The present study |
| HT1     | BWP17 RFA2-Myc::URA3                                                                                    | [2]               |
| HT2     | BWP17 pph3Δ::ARG4/ pph3Δ::HIS1 RFA2-Myc:URA3                                                            | [2]               |
| HT3     | BWP17 psy2Δ::ARG4/ psy2Δ::HIS1 RFA2-Myc:URA3                                                            | [2]               |
| HT4     | BWP17 ptc2Δ::ARG4/ ptc2Δ::HIS1 RFA2-Myc:URA3                                                            | [2]               |
| HT5     | BWP17 pph3Δ::ARG4/pph3Δ::HIS1 ptc2Δ::FRT/ ptc2Δ::FRT RFA2-Myc:URA3                                      | [2]               |
| HT25    | BWP17 glc7Δ::ARG4/PMET3-GLC7::HIS1 RFA2-Myc:URA3                                                        | The present study |
| HT26    | BWP17 PPH3/PPH3-6MYC:URA3 RFA2/RFA2-GFP:HIS                                                             | The present study |
| HT27    | BWP17 PSY2/PSY2-6MYC:URA3 RFA2/RFA2-GFP:HIS                                                             | The present study |
| HT28    | BWP17 pph3Δ::ARG4/ pph3Δ::HIS1 PPH3-HA:URA3                                                             | The present study |
| HT29    | BWP17 pph3Δ::ARG4/ pph3Δ::HIS1 pph3H112A-HA:URA3                                                        | The present study |
| HT30    | BWP17 PMET3-MYC-Δ40-RFA2::URA3                                                                          | The present study |
| HT31    | BWP17 RFA2-190-MYC::URA3                                                                                | The present study |
| HT32    | BWP17 pph3Δ::ARG4/pph3Δ::HIS1 PMET3-MYC-Δ40-RFA2::URA3                                                  | The present study |
| HT33    | BWP17 pph3Δ::ARG4/pph3Δ::HIS1 RFA2-190-MYC::URA3                                                        | The present study |
| WYS2    | mrc1Δ::ARG4/mrc1Δ::HIS1                                                                                 | [3]               |
| HT34    | mrc1Δ::ARG4/mrc1Δ::HIS1 RFA2-Myc URA3                                                                   | The present study |
| WYS1    | rad9Δ::ARG4/rad9Δ::URA3                                                                                 | [3]               |
| HT35    | rad9Δ::ARG4/rad9Δ::URA3 RFA2-Myc HIS1                                                                   | The present study |
| HT36    | BWP17 mec1Δ::ARG4/PMET3-MEC1::URA3                                                                      | The present study |
| HT37    | BWP17 mec1Δ::ARG4/PMET3-MEC1::URA3 RFA2-Myc:HIS                                                         | The present study |
| HT38    | BWP17 lme2Δ::ARG4/lme2Δ::HIS1                                                                           | The present study |
| HT39    | BWP17 lme2Δ::ARG4/lme2Δ::HIS1 RFA2-Myc:URA3                                                             | The present study |
| WY      | BWP17 cdc28Δ::ARG4/PMET3-CDC28as::URA3                                                                  | [3]               |
| HT40    | BWP17 cdc28Δ::ARG4/PMET3-CDC28as::URA3 RFA2-Myc:HIS1                                                    | The present study |
| HT41    | BWP17 RFA2-HIS-tag-URA3                                                                                 | The present study |
| HT42    | BWP17 pph3Δ::ARG4/ pph3Δ::HIS1 RFA2-HIS-tag:URA3                                                        | The present study |
| HT43    | BWP17 psy2Δ::ARG4/ psy2Δ::HIS1 RFA2-HIS-tag:URA3                                                        | The present study |
| HT44    | BWP17 rfa2S18A/S30A-Myc::URA3                                                                           | The present study |
| HT45    | BWP17 pph3Δ::ARG4/ pph3Δ::HIS1 rfa2S18A/S30A-Myc::URA3                                                  | The present study |
| HT46    | BWP17 psy2Δ::ARG4/ psy2Δ::HIS1 rfa2S18A/S30A-Myc::URA3                                                  | The present study |
| HT47    | BWP17 rfa2T24A/T34A/T35A/T36A-Myc::URA3                                                                 | The present study |
| HT48    | BWP17 pph3Δ::ARG4/ pph3Δ::HIS1 rfa2T24A/T34A/T35A/T36A-Myc::URA3                                        | The present study |
| HT49    | BWP17 psy2Δ::ARG4/ psy2Δ::HIS1 rfa2T24A/T34A/T35A/T36A-Myc::URA3                                        | The present study |
| HT50    | BWP17 rfa2T43A/S146A/S153A-Myc::URA3                                                                    | The present study |
| HT51    | BWP17 rfa2T43A/S146A/S153A-Myc::URA3                                                                    | The present study |
| HT52    | BWP17 rfa2T43A/S146A/S153A-Myc::URA3                                                                    | The present study |
| HT53    | BWP17 rfa2S211A/T213A/S247A-Myc::URA3                                                                   | The present study |
| HT54    | BWP17 pph3Δ::ARG4/ pph3Δ::HIS1 rfa2S211A/T213A/S247A-Myc::URA3                                          | The present study |
| HT55    | BWP17 psy2Δ::ARG4/ psy2Δ::HIS1 rfa2S211A/T213A/S247A-Myc::URA3                                          | The present study |
| HT56    | BWP17 rfa2S18A/T24A/T34A/T35A/T36A/T43A/S146A/S153A/S211A/T213A/S247A-Myc::URA3                         | The present study |
| HT57    | BWP17 pph3Δ::ARG4/pph3Δ::HIS1 rfa2S18A/T24A/T34A/T35A/T36A/T43A/S146A/S153A/S211A/T213A/S247A-Myc::URA3 | The present study |
| HT58    | BWP17 psy2Δ::ARG4/psy2Δ::HIS1 rfa2S18A/T24A/T34A/T35A/T36A/T43A/S146A/S153A/S211A/T213A/S247A-Myc::URA3 | The present study |

## REFERENCES

- Wilson, R. B., Davis, D. and Mitchell, A. P. (1999) Rapid hypothesis testing with *Candida albicans* through gene disruption with short homology regions. *J. Bacteriol.* **181**, 1868–1874
- Wang, H., Gao, J., Li, W., Wong, A. H., Hu, K., Chen, K., Wang, Y. and Sang, J. (2012) Pph3 dephosphorylation of Rad53 is required for cell recovery from MMS-induced DNA damage in *Candida albicans*. *PLoS ONE* **7**, e37246
- Shi, Q. M., Wang, Y. M., Zheng, X. D., Lee, R. T. and Wang, Y. (2007) Critical role of DNA checkpoints in mediating genotoxic-stress-induced filamentous growth in *Candida albicans*. *Mol. Biol. Cell* **18**, 815–826

Received 9 June 2012/7 November 2012; accepted 9 November 2012

Published as BJ Immediate Publication 9 November 2012, doi:10.1042/BJ20120952
